# Supplementary material for: Evidence of two distinct functionally specialized fibroblast lineages in breast stroma
Source: PubMed Central journal article supplement (PMC5093959; doi:10.1186/s13058-016-0769-2), 2016-11-03
Supplement: 13058_2016_769_MOESM3_ESM.pdf [file 13058_2016_769_MOESM3_ESM.pdf]

**Figure S3.  $CD105^{high}$  and  $CD26^{high}$  fibroblasts remain phenotypically and functionally different in high passage cultures**

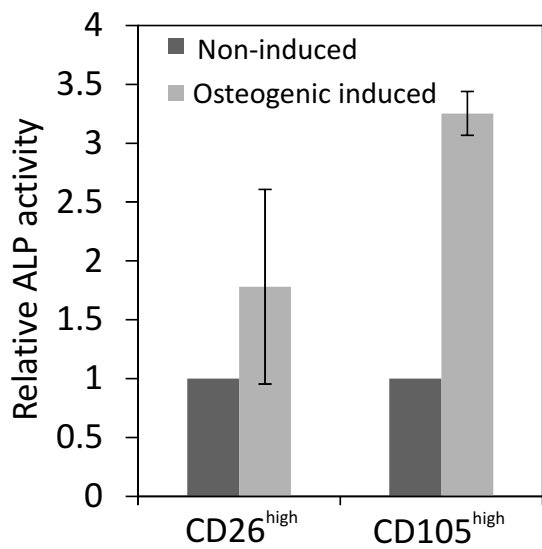

**a**

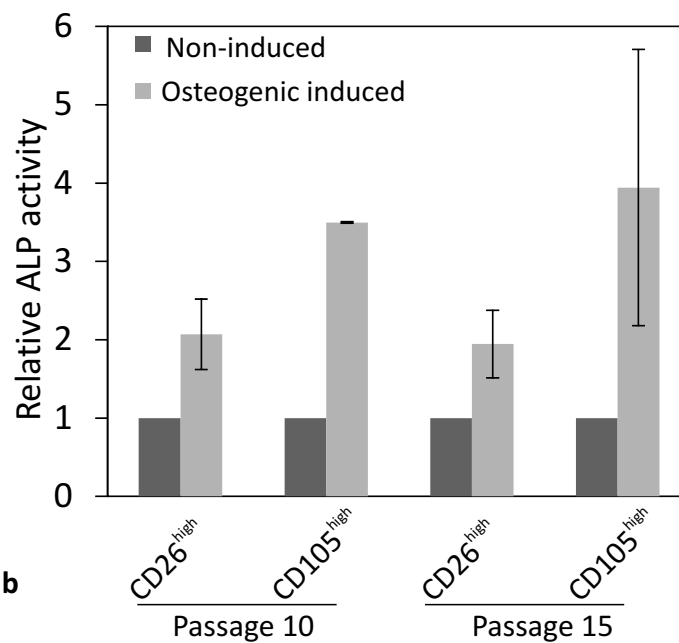

**b**
