# Supplementary material for: Evidence of two distinct functionally specialized fibroblast lineages in breast stroma
Source: PubMed Central journal article supplement (PMC5093959; doi:10.1186/s13058-016-0769-2), 2016-11-03

**Figure S5. Branching morphogenesis reflects activity of luminal progenitors**

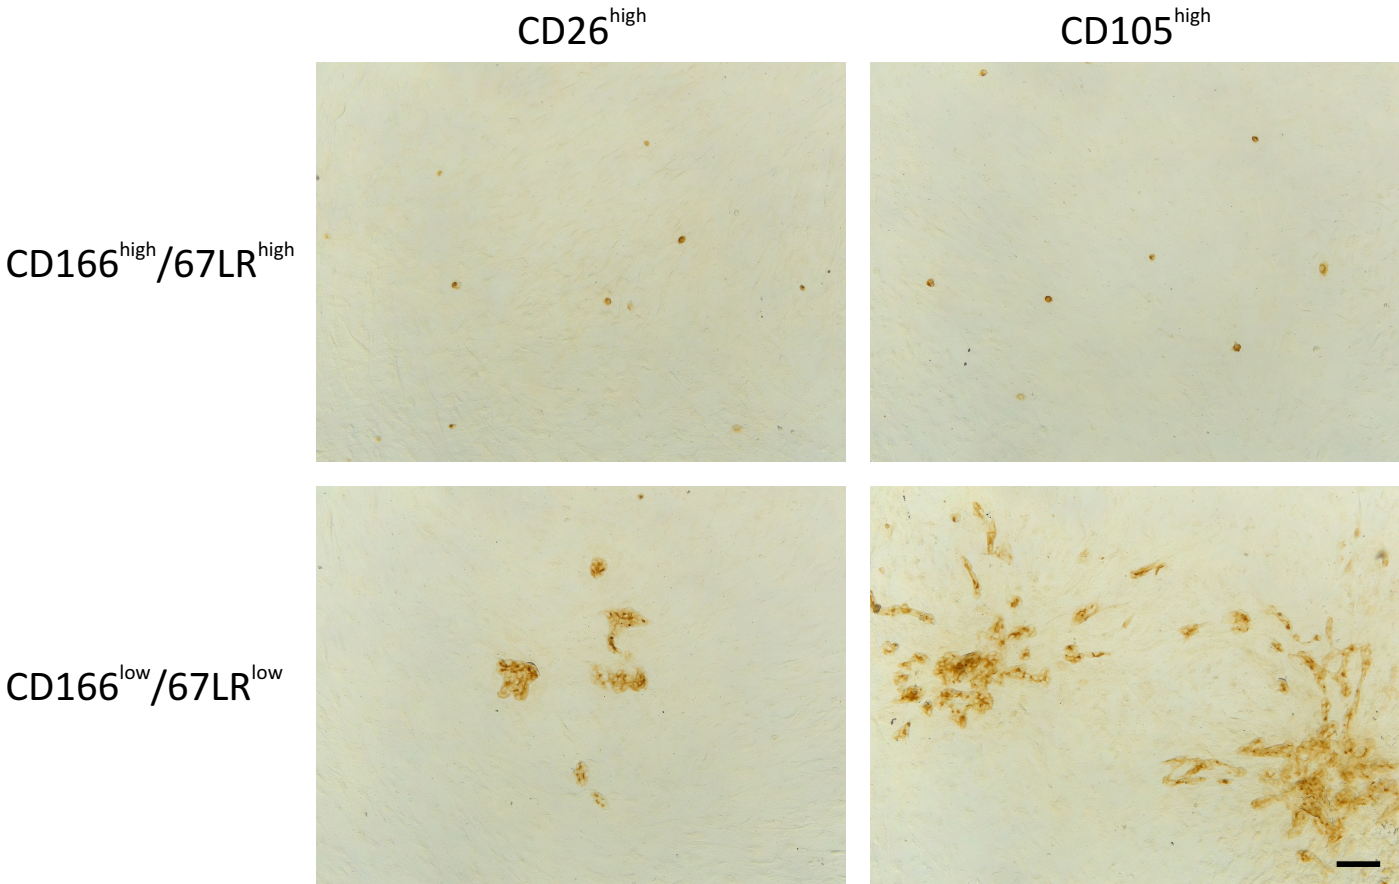

Supplement: 13058_2016_769_MOESM5_ESM.pdf [file 13058_2016_769_MOESM5_ESM.pdf]
