# Supplementary material for: Evidence of two distinct functionally specialized fibroblast lineages in breast stroma
Source: Springer Nature journal article supplement (doi:10.1186/s13058-016-0769-2), 2016-11-03

**Figure S1. Confirmation of microarray analysis by RT-qPCR**

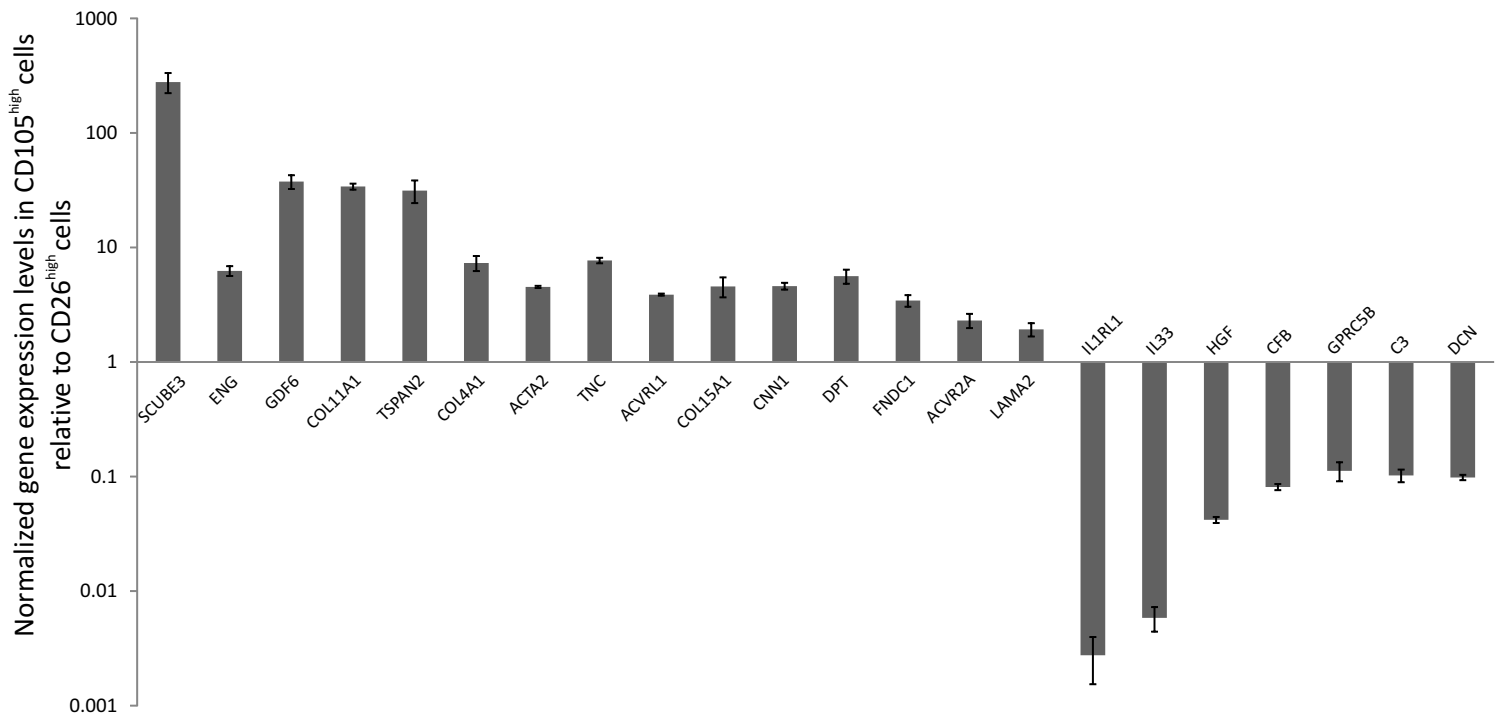

Supplement: MOESM1 [file 11015506]
